# Supplementary material
Source: Springer Nature journal article supplement (https://www.springermedizin.de/resource/supplementary/12916_2013_838_MOESM2_ESM.pdf/9598428)

## Men

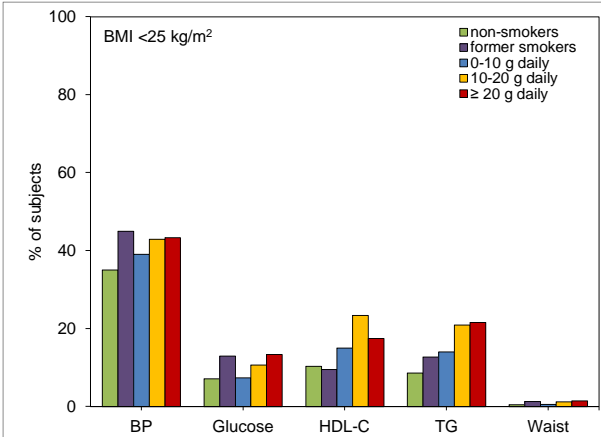

## Women

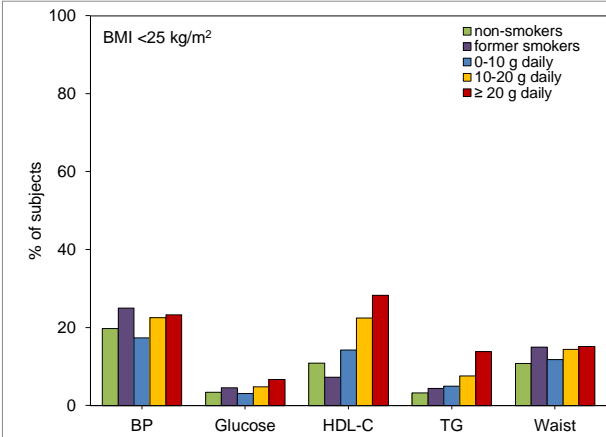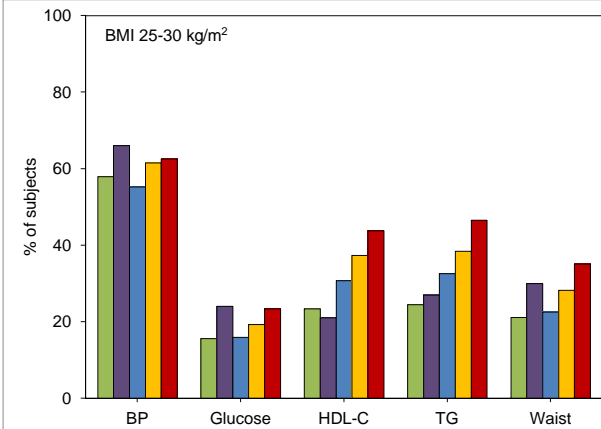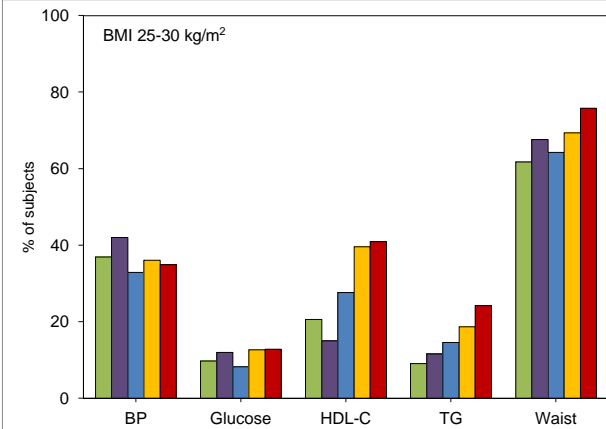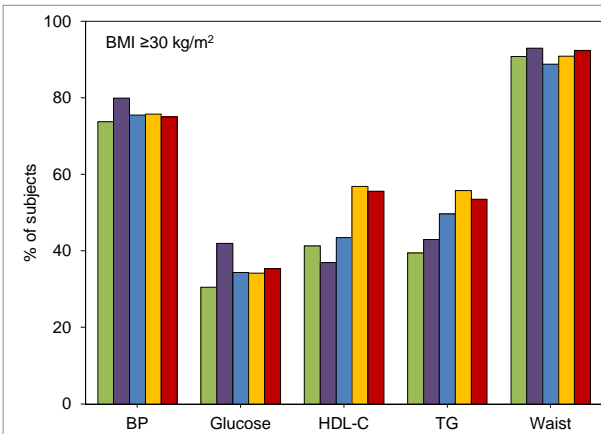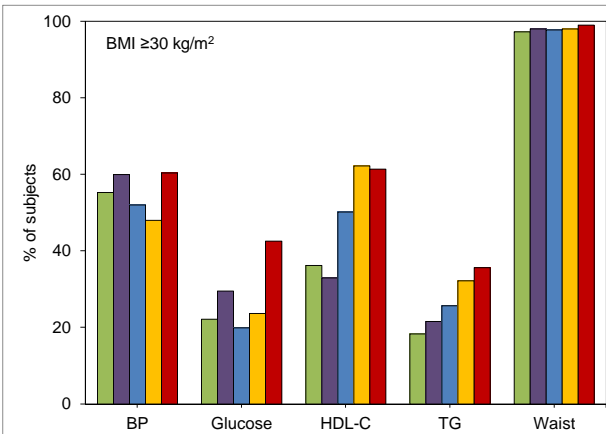

Supplement: MOESM2 [file 9598428]
